# Supplementary material
Source: ML conference proceedings conference paper supplement (https://openreview.net/forum?id=DNBwlQYA90)
Supplement: supplementary_material [file attachment]

동 의 서 (연구참여자 보관용)

연구 과제명 : 언더-디스플레이 카메라(Under-Display Camera, UDC)의 비디오 데이터셋  
구축 및 딥러닝 복원 모델 개발

연구 책임자명 :  (  대학교  대학원  학과  )

1. 나는 이 설명서를 읽었으며 담당 연구원과 이에 대하여 의논하였습니다.
2. 나는 위험과 이득에 관하여 들었으며 나의 질문에 만족할 만한 답변을 얻었습니다.
3. 나는 이 연구에 참여하는 것에 대하여 자발적으로 동의합니다.
4. 나는 이 연구에서 얻어진 나에 대한 정보를 현행 법률과 생명윤리위원회 규정이 허용하는 범위 내에서 연구자가 수집하고 처리하는 데 동의합니다.
5. 나는 담당 연구자나 위임 받은 대리인이 연구를 진행하거나 결과 관리를 하는 경우와 법률이 규정한 국가 기관 및 대학교 생명윤리위원회가 실태 조사를 하는 경우에는 비밀로 유지되는 나의 개인 신상 정보를 확인하는 것에 동의합니다.
6. 나는 언제라도 이 연구의 참여를 철회할 수 있고 이러한 결정이 나에게 어떠한 해도 되지 않을 것이라는 것을 압니다.
7. 나의 서명은 이 동의서를 받았다는 것을 뜻하며 나와 동의받는 연구원의 서명이 포함된 동의서를 보관하겠습니다.
8. 나는 수집되는 자료가 본 연구 이외에 연구책임자 및 다른 연구자의 연구의 목적으로 사용되는 것에 동의합니다.  
동의함 ☒      동의하지 않음 ☐
9. 나는 나의 얼굴 및 행동이 포함된 영상이 수집되는 것을 알고 있으며, 연구에 사용되는 것을 허락합니다.  
동의함 ☐      동의하지 않음 ☒
10. 나는 중도 포기 혹은 중도 탈락 시, 그동안 수집된 나의 자료가 계속 활용되는 것에 동의합니다.

연구참여자 성명 (익명 ID)

서명

날짜 (년/월/일)

동의받는 연구원 성명

서명

날짜 (년/월/일)

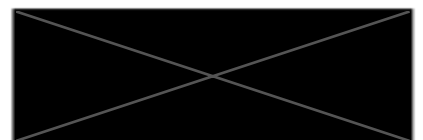

동의서 (연구자보관용)

연구 과제명 : 언더-디스플레이 카메라(Under-Display Camera)의 비디오 데이터셋 구축  
및 딥러닝 복원 모델 개발

연구 책임자명 : [X] [X] 대학교 [X] [X] 대학원 [X] [X] 학과 [X]

1. 나는 이 설명서를 읽었으며 담당 연구원과 이에 대하여 의논하였습니다.
2. 나는 위험과 이득에 관하여 들었으며 나의 질문에 만족할 만한 답변을 얻었습니다.
3. 나는 이 연구에 참여하는 것에 대하여 자발적으로 동의합니다.
4. 나는 이 연구에서 얻어진 나에 대한 정보를 현행 법률과 생명윤리위원회 규정이 허용하는 범위 내에서 연구자가 수집하고 처리하는 데 동의합니다.
5. 나는 담당 연구자나 위임 받은 대리인이 연구를 진행하거나 결과 관리를 하는 경우와 법률이 규정한 국가 기관 및 XXXXXXXXXX대학교 생명윤리위원회가 실태 조사를 하는 경우에는 비밀로 유지되는 나의 개인 신상 정보를 확인하는 것에 동의합니다.
6. 나는 언제라도 이 연구의 참여를 철회할 수 있고 이러한 결정이 나에게 어떠한 해도 되지 않을 것이라는 것을 압니다.
7. 나의 서명은 이 동의서를 받았다는 것을 뜻하며 나와 동의받는 연구원의 서명이 포함된 동의서를 보관하겠습니다.
8. 나는 수집되는 자료가 본 연구 이외에 연구책임자 및 다른 연구자 XXXXXXXXXX XXXXXXXXXX XXXXXXXXXX의 연구의 목적으로 사용되는 것에 동의합니다.

동의함 ☐      동의하지 않음 ☐
9. 나는 나의 얼굴 및 행동이 포함된 영상이 수집되는 것을 알고 있으며, 연구에 사용되는 것을 허락합니다.

동의함 ☐      동의하지 않음 ☐
10. 나는 중도 포기 혹은 중도 탈락 시, 그동안 수집된 나의 자료가 계속 활용되는 것에 동의합니다.

동의함 ☐      동의하지 않음 ☐

날짜 (년/월/일)

날짜 (년/월/일)
