# Supplementary material
Source: ML conference proceedings conference paper supplement (https://openreview.net/forum?id=DNBwlQYA90)
Supplement: supplementary_material [file attachment]

# 심의결과 통보서

## 수신

|       |                |                                  |                |
|-------|----------------|----------------------------------|----------------|
| 연구책임자 | 이름: [REDACTED] | 소속: [REDACTED] 대학원 [REDACTED] 학과 | 직위: [REDACTED] |
| 지원기관  | 해당없음           |                                  |                |

## 과제정보

|        |                                                                                                                                                                                                                                                                         |        |            |
|--------|-------------------------------------------------------------------------------------------------------------------------------------------------------------------------------------------------------------------------------------------------------------------------|--------|------------|
| 승인번호   | IRB No [REDACTED]                                                                                                                                                                                                                                                       |        |            |
| 연구과제명  | 언더-디스플레이 카메라(Under-Display Camera, UDC)의 비디오 데이터셋 구축 및 딥러닝 복원 모델 개발                                                                                                                                                                                                     |        |            |
| 연구종류   | 학술연구, 기타(사람의 얼굴이 포함된 영상 자료 수집 (행동 분석이 아닌, 단순히 사람이 포함된 영상 데이터를 확보하는 것임))                                                                                                                                                                                                 |        |            |
| 심의종류   | 신규                                                                                                                                                                                                                                                                      |        |            |
| 심의일자   | 2024-04-11                                                                                                                                                                                                                                                              |        |            |
| 심의대상   | 설명문 및 동의서 또는 서면동의 면제사유서, 연구결과정리양식, 생명윤리준수서약서, 모집문건, 연구책임자 경력사항                                                                                                                                                                                                          |        |            |
| 심의결과   | 승인                                                                                                                                                                                                                                                                      |        |            |
| 승인일자   | 2024-04-11                                                                                                                                                                                                                                                              | 승인유효기간 | 2025-04-10 |
| 정기보고주기 | 12개월                                                                                                                                                                                                                                                                    |        |            |
| 심의의견   | 1. 심의결과 제출하신 연구계획에 대해 승인합니다.<br>2. 연구자께서는 승인된 문서를 사용하여 연구를 진행하시기 바라며, 만일 연구진행 과정에서 계획상에 변경사항 (연구자 변경, 연구 내용 변경 등)이 발생할 경우 본 위원회에 변경신청을 하여 승인 받은 후 연구를 진행하여 주십시오.<br>3. 유효기간 내 연구가 끝났을 경우 종료 보고서를 제출하여야 하며, 승인유효기간 이후에도 연구를 계속하고자 할 경우, 2025-03-10 까지 지속심의를 받도록 하여 주십시오. |        |            |
| 검토의견   | 계획서 검토의견                                                                                                                                                                                                                                                                |        |            |
|        | 동의서 검토의견                                                                                                                                                                                                                                                                |        |            |
|        | 기타 검토의견                                                                                                                                                                                                                                                                 |        |            |

2024년 04월 11일

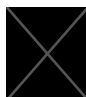

대학교 생명윤리위원회 위원장

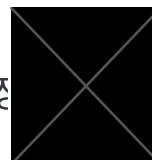

본 위원회가 승인한 연구를 수행하는 연구자들은 다음의 사항을 준수해야 합니다.

- 반드시 계획서에 따라 연구를 수행해야 합니다.
- 위원회의 승인을 받은 연구참여자 동의서를 사용해야 합니다.
- 모국어가 한국어가 아닌 연구참여자에게는 승인된 동의서를 연구참여자의 모국어로 번역하여 사용해야 하며 번역본은 인증 및 위원회의 승인을 거쳐야 합니다.
- 연구참여자 보호를 위해 불가피한 경우를 제외하고는 연구 진행중의 변경에 대해서는 위원회의 사전 승인을 받아야 합니다. 연구참여자의 보호를 위해 취해진 응급상황에서의 변경에 대해서는 즉각 위원회에 보고해야 합니다.
- 위원회에서 승인 받은 계획서에 따라 등록된 연구참여자의 사망, 임원, 심각한 질병에 대하여는 위원회에 서면으로 보고해야 합니다.
- 임상시험 또는 연구참여자의 안전에 대해 유해한 영향을 미칠 수 있는 새로운 정보는 즉각 위원회에 보고해야 합니다.
- 위원회의 요구가 있을 때에는 연구의 진행과 관련된 사항에 관하여 위원회에 보고해야 합니다.
- 연구참여자 모집광고는 사용 전에 위원회로부터 승인을 받아야 합니다.
- 강제 혹은 부당한 영향력이 없는 상태에서 충분한 설명을 근거하여 연구참여자로부터 동의를 받아야 하며, 잠재적인 연구참여자에 대해서 연구 참여 여부를 숙려할 수 있도록 충분한 기회를 제공해야 합니다.
